# Supplementary material
Source: PubMed Central journal article supplement (PMC1740291)
Supplement: oenvmed_59_6_387__1.pdf [file oenvmed_59_6_387__1.pdf]

# Questionnaire

## About?

### Knowledge, Attitude, Practice Toward Pesticides and Toxicity Symptoms Among Farmworkers in Gaza Strip-PNA, 1999.

SN

Date: dd /mm /yy

Q1. Area: (1) North , (2) Gaza , (3) Mid Zone , (4) Khan Yunis , (5)Rafah

Q1.1 Subarea (1)Beit Hanon (2) Beit Lahia (3) El-Sheich Ejlin, Abu Madan, (Gaza west) (4)El-Manshia, Johr Eldek, Zaiton (5)Al Mughraka (6) Nusirat (7) Zawaida (8)Dir-El-Balah (9) El-Msader (10)El-Gararah (11) Kh. West, (12)Kh. Mid and East (13) Absan Kap. (14)Absan Sag (15)Bani Suhaila (16) Khuza'a (17) Rafah West (18) Rafah Mid & East

Q2. Name: ..... Tel. No.....

Q3. Sex : (1)Male (2)Female .

Q4. Age (year)

Q5. Education :

(1) Illiterate, (2)Primary, (3)Preparatory, (4)Sec. School, (5)Dip, University.

Q6. Martial Status : (1) Married, (2) Single, (3)Widowed, (4)Divorced

*In the case of married:* Q6.1  Years of marriage .

Q6.2  Have you children ? (1) Yes (0) No

Q7 . Smoker (1) Yes (0) No

Q8. The Field

(1) Open, (2) Close , (3)1+2

Q9. Type of Crops :

9.1. Vegetables (1) Yes (0)No

9.2. Fruits (1) Yes (0)No

9.3. Citrus (1) Yes (0)No

9.4. Flowers (1) Yes (0)No

Q10. Does any Agronomist come to visit your farm periodically?

(1) Yes (0)No

10.1 If reply to Q.10 is Yes, please mention to the Agronomist's sector  
which he is belong to.....

\_\_\_\_\_

**Q 11. Are you using pesticides ?** (1) Yes (0)No  
*If No, skip to Q. 29.*

**Q 12. How long have you been using pesticides ?**

**Q13 . Do you follow the instruction of pesticides bottle's label ?** (1) Yes (0)No  
*13.1. If reply to Q.13 is No please, Justify .....*

**Q14. Do you spray two or more mixed pesticides ?** (1) Yes (0)No  
*14.1. If reply to Q.14 is Yes, please, justify.....*

**Q 15. The concentration of pesticides do you use are :**  
*(1) The recommended*  
*(2) More than the recommended*  
*(3) Less than the recommended*  
*(4) Not committed with the specific concentration .*

**Q16 Where do you store empty pesticides bottles or cans ?**

- 16. 1 In specific storage in the farm site (1) Yes (0)No
- 16.2 In the home . (1) Yes (0)No
- 15.3 Other places, please specify .....

**Q17. What are you doing with the empty pesticides bottles or cans ?**

- 17.1 For home uses (*storage water*) (1) Yes (0)No
- 17.2 For home uses (*storage food stuff*) . (1) Yes (0)No
- 17.3 Uses for storage other pesticides types.(1) Yes (0)No
- 17.4 Throw it on the garbage sites , farm site, or along the sides of streets. (1) Yes (0)No
- 17.5 Burying or burning the empty pesticides bottles or cans? (1) Yes (0)No

**Q18. Do you apply pesticides by spraying ?** (1) Yes (0)No

**Q. 19. Which of the following do you wear during preparing or spraying pesticides ?**

- 19.1 Gloves (1) Yes (0)No
- 19.2 Goggles (1) Yes (0)No
- 19.3 Wide brimmed hat (1) Yes (0)No
- 19.4 Mask (1) Yes (0)No
- 19.5 Special Boot (1) Yes (0)No
- 19.6 Overall (1) Yes (0)No

**Q20. During spraying , are you doing the following ?**

- 20.1 Smoking (1) Yes (0)No  
 20.2 Drinking (1) Yes (0)No  
 20.3 Eating (1) Yes (0)No  
 20.4 Chewing Gum (1) Yes (0)No

**Q21. Do you take shower after spraying ?**

(1) Yes (0)No

**Q22. If yes, Do you take the shower directly after spraying?**

(1) Yes (0)No

22.1 If reply to Q.21 is No, please specify the time period prior taking the shower ?

**Q23. How long after the field has been sprayed with pesticides , do you re-enter it to work ?**

**Q24. Have you keep any first aid in the farm place ?**

(1) Yes (0)No

**Q25. Have you been participated in seminars or training courses related to the health impact and minimizing use of pesticides ?**

(1) Yes (0)No

25.1 If reply to Q.25 is yes, please specify the organization , the institute or any other sector which conducted that ? .....

**Q26. Do you commit the safety period (the period between the last spraying and the harvesting ) ?**

(1) Yes (0)No

**Q 27. Do you know the name of pesticides do you use ?**

(1) Yes (0)No

**Q28. If reply in Q.27 Yes, please specify the name of it ?**

- 1.....2 ..... 3..... 4....  
5.....6 ..... 7..... 8 ...  
9.....10.....11.....12...

**Q. 29. Do you know any other ways for pest control rather than pesticides use?**

(1) Yes (0)No

---

**Q30. If reply to Q.29 is yes, the pest control which you know are include the following ?**

- 30.1 Biological Control (1) Yes (0)No  
 30.2 Natural Control (1) Yes (0)No  
 30.3 Using agricultural ways for pest control (1) Yes (0)No

**Q31. Do you know that , the exposure to the pesticides has an adverse health effect or impact on the human health ?**

(1) Yes (0)No (9) don't know

*If reply to Q.31 is No , please don't ask Q. 32, 34 & 35 and Qs. from (40-43).*

**Q32. Are all the pesticides have the same adverse health effect on the human health .** (1) Yes (0)No (9) don't know

**Q33. Do pesticides enter human body through the following ?**

- 33.1 Inhalation (1) Yes (0)No (9) don't know  
 33.2 Skin (1) Yes (0)No (9) don't know  
 33.3 Mouth (1) Yes (0)No (9) don't know

**Q 34. According to your knowledge, do the adverse health effects of the pesticides include the following ( ) ?**

- 34.1 Headache/ Migraine (1) Yes (0)No (9) don't know  
34.2 Watering / Sore eyes (1) Yes (0)No (9) don't know  
34.3 Cough/Cold/Chest pain/Breathlessness (1) Yes (0)No (9) don't know  
34.4 Dizziness (1) Yes (0)No (9) don't know  
34.5 Weakness (1) Yes (0)No (9) don't know  
34.6 Burning sensation in eyes /face (1) Yes (0)No (9) don't know  
34.7 Skin rash (1) Yes (0)No (9) don't know  
34.8 Itching / Skin irritation (1) Yes (0)No (9) don't know  
34.9 Salivation/nausea/vomiting (1) Yes (0)No (9) don't know  
34.10 Abdominal pain/ diarrhea (1) Yes (0)No (9) don't know  
34.11 Fever/rise in temperature (1) Yes (0)No (9) don't know  
34.12 Forgetfulness (1) Yes (0)No (9) don't know  
34.13 Impotence/ loss of libido (for men) (1) Yes (0)No (9) don't know  
34.14 Infertility /miscarriages (for women) (1) Yes (0)No (9) don't know  
34.15 Others , please specify .....

Q35. Are you suffering from any of the previous symptoms  
(for nonexposed)/as a result of using pesticides (for farm-workers)?  
(1) Yes (0)No

35.1 –35.15 If reply to Q.35 is Yes, please specify the symptoms you have suffered  
from ( in Q 34)

Q36. Do you know that the pesticides residue may be exist in the  
following ?

Q. 36.1 The air (1) Yes (0)No (9) don't know

Q. 36.2 The soil (1) Yes (0)No (9) don't know

Q. 36.3 Ground water (1) Yes (0)No (9) don't know

Q. 36.4 Fruits, seeds and leaves of vegetables and fruits  
(1) Yes (0)No (9) don't know

Q37. Do you know that, there are an Internationally prohibited or  
forbidden pesticides ? (1) Yes (0)No (9) don't know

---

Q38. Are you with ( your opinion) pesticides use ?  
(1) Yes (0)No

Q.39. If reply to Q.38 whether Yes or No , please, justify your using to  
pesticides ? .....

Q40. Which of the following do you think can protect farm-workers  
from the harmful effects of pesticides?

40.1 Wearing gloves (1) Yes (0)No (9) don't know

40.2 Using goggles (1) Yes (0)No (9) don't know

40.3 Wearing wide brimmed hat (1) Yes (0)No (9) don't know

40.4 Putting on nasal masks (1) Yes (0)No (9) don't know

40.5 Wearing special boots (1) Yes (0)No (9) don't know

40.6 Wearing overall (1) Yes (0)No (9) don't know

Q41. As A farm-worker, do you believe that your body has developed  
an immunity against pesticides ? (1) Yes (0)No (9) don't know

Q42. Have you seen any pesticides poisoning cases or informed  
about it ? (1) Yes (0)No (9) don't know

Q43. Have you seen any death cases from pesticides use or  
informed about it ? (1) Yes (0)No (9) don't know

Q44. Is there any toxicological or medical center , in your area  
provides medical services to farm-works. (1)Yes (0)No (9) don't know

**Thank you for your kind cooperation**
